# Supplementary material for: Multi-color inkless UV printing using angle-independent structural color paper
Source: Royal Society of Chemistry journal article supplement (doi:10.1039/d2tc03370d), 2022-01-01
Supplement: d2tc03370d1.pdf [file d2tc03370d1.pdf]

1

## Supplementary Materials for

2 **Multi-color inkless UV printing using angle-independent structural color papers**

3 *Meixing Ai, Zhihao Wang, Xianmei Chen, Chong Chen, Yunlong Wang\*, Jun Ma\**

4 *College of Materials Science and Technology, Nanjing University of Aeronautics and*

5 *Astronautics, Nanjing 211106, China*

6 *Corresponding authors: wylong@nuaa.edu.cn; junma@nuaa.edu.cn*

7

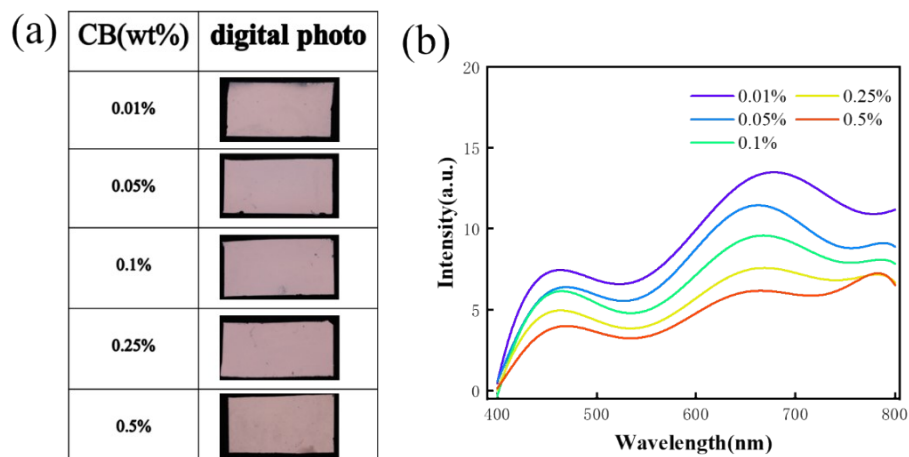

8

9 Fig S1: Optical photographs and reflectance spectra of photonic papers with varying  
10 quantities of CB in the preparation process.

11

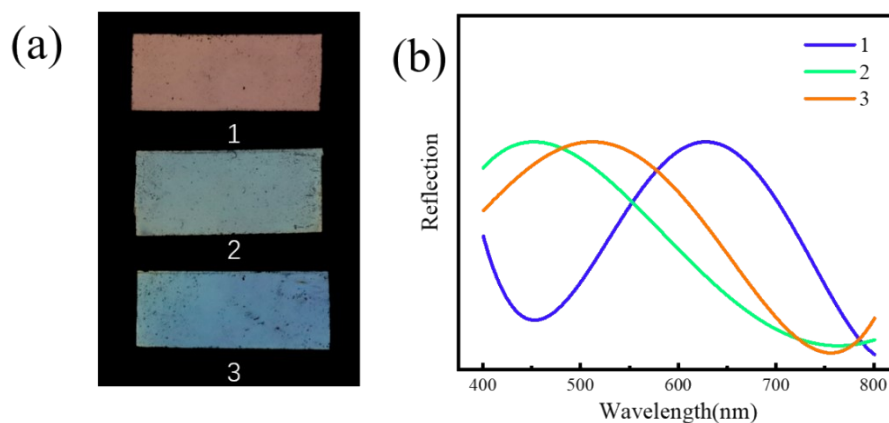

12

13 Fig S2: (a) Digital photographs of amorphous color papers prepared using silica  
14 particles with diameters of 250, 300, and 360. (b) Corresponding reflection spectra of  
15 the structural colors papers.

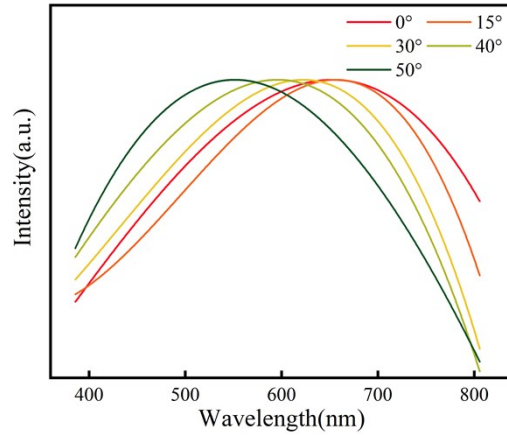

16

17 Fig S3: Scattering spectra of the magenta-colored sample in Fig.1f

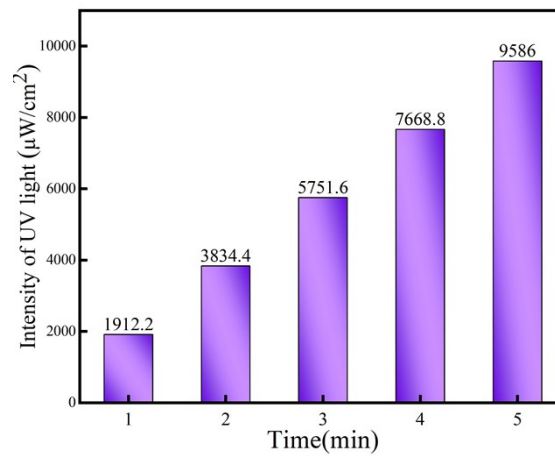

18

19 Fig S4: Light intensity of UV lamp with different irradiation times

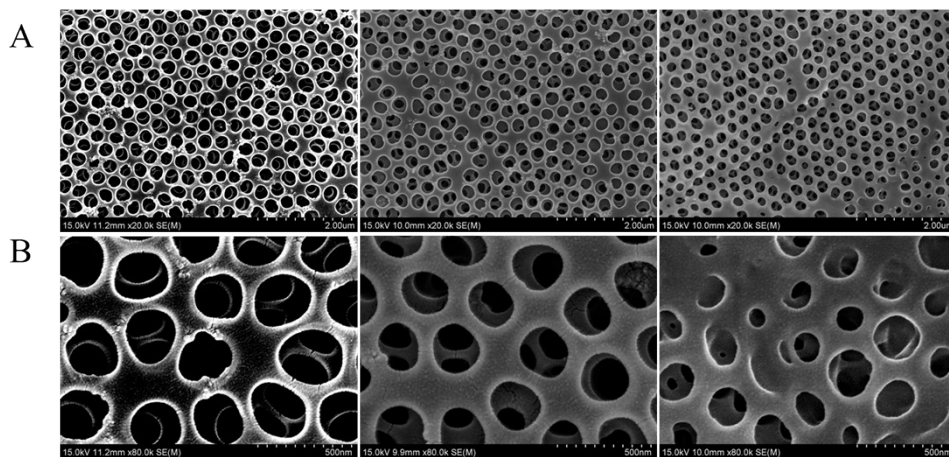

20

21 Fig S5: Top-view SEM images of samples irradiated for 0 min, 3 min and 5min  
 22 respectively, scale bar: 2  $\mu\text{m}$ (A), 500 nm(B).

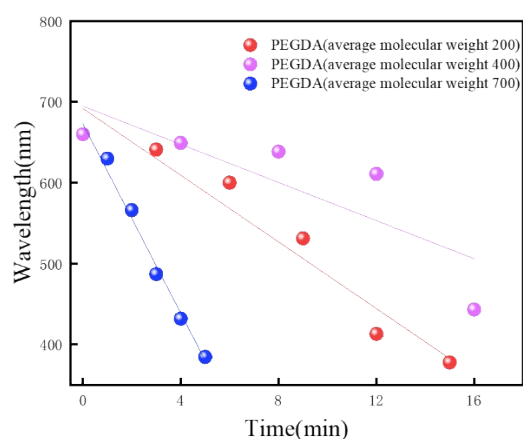

23

24 Fig S6: UV response of photonic papers prepared with PEGDA precursor with  
 25 different molecular weights (Mn 200, 400, and 700).

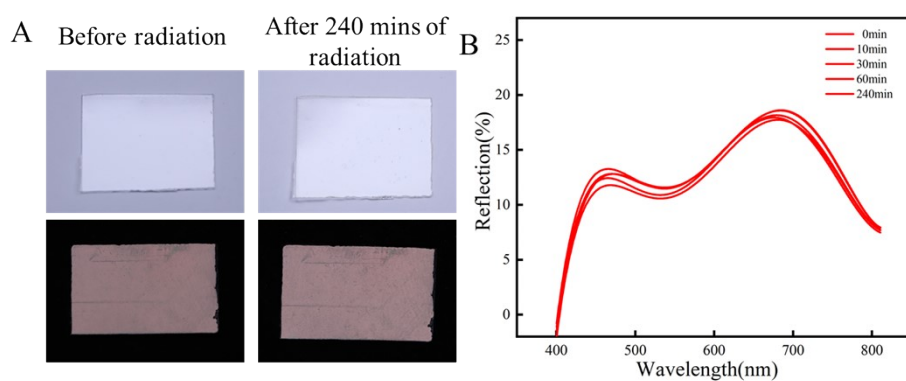

26

27 Fig S7: (A) Photographs of blank PEGDA without pores and red PEGDA paper have  
 28 no change after 240 mins of irradiation. (B) Reflectance spectra of PEGDA photonic  
 29 paper during 240 minutes of irradiation.

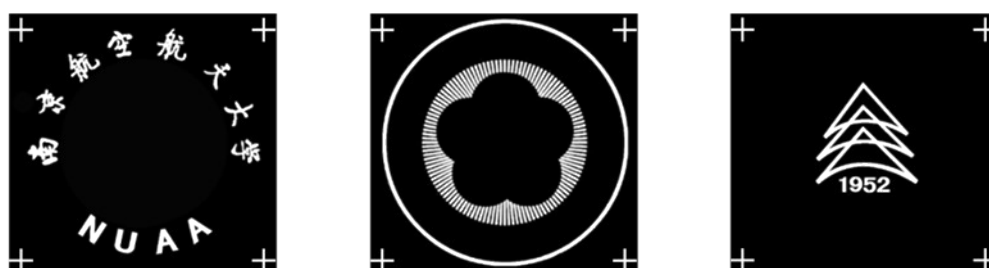

30

31 Fig S8: Photos of three masks utilized for the fabrication of NUA A badge pattern

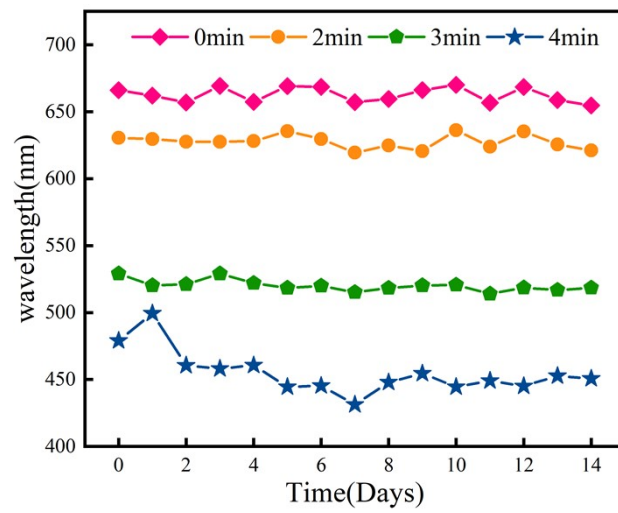

32

33 Fig S9: Post-radiation effects of PEGDA photonic paper irradiated various times under  
34 UV.
